# Supplementary material
Source: PubMed Central journal article supplement (PMC7774270)
Supplement: ao0c05083_si_001.pdf [file ao0c05083_si_001.pdf]

**The TRPA1 agonist cinnamaldehyde decreases adipogenesis in 3T3-L1 cells more potently than the non-agonist structural analog cinnamyl isobutyrate**

Julia K. Hoi<sup>1</sup>, Barbara Lieder<sup>1</sup>, Beatrix Liebisch<sup>1</sup>, Christiane Czech<sup>1</sup>, Joachim Hans<sup>2</sup>, Jakob P. Ley<sup>2</sup>, Veronika Somoza<sup>3\*</sup>

<sup>1</sup> Department of Physiological Chemistry, Faculty of Chemistry, University of Vienna, Althanstraße 14, Vienna, Austria

<sup>2</sup> Symrise AG, Muehlenfeldstraße 1, Holzminden, Germany

<sup>3</sup> Leibniz Institute for Food Systems Biology at the Technical, University of Munich, Chair of Nutritional Systems Biology, Technical University of Munich, Lise-Meitner-Strasse 34, 85345 Freising, Germany

**Figure 1**

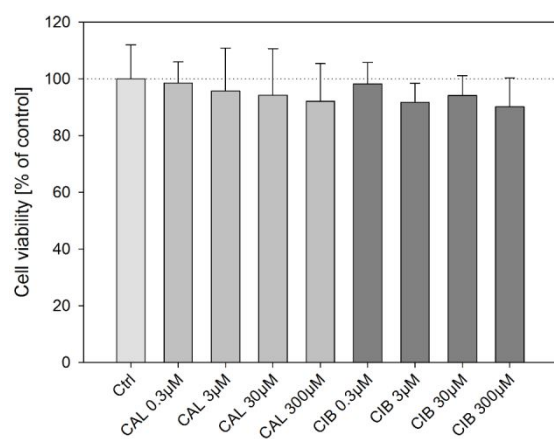

Figure S1. Cell viability after a 90-min treatment with cinnamaldehyde (CAL) and cinnamyl isobutyrate (CIB) in concentrations of 0.3 – 300 µM. Values are displayed as mean ± SD in percent compared to the control (buffer with 0.1 % ethanol). n = 4-5 (tr = 2-3).

**Figure 2**

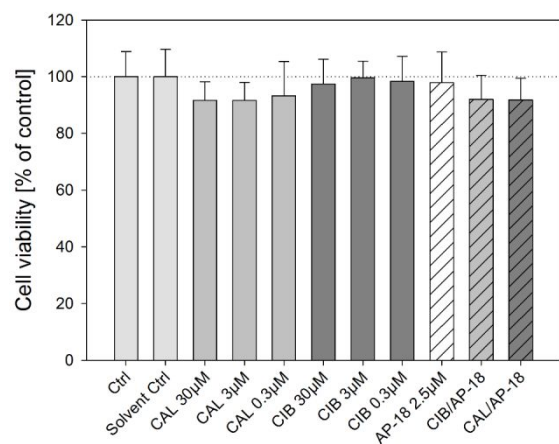

Figure S2. Cell viability after a 90-min treatment with cinnamaldehyde (CAL) and cinnamyl isobutyrate (CIB) in concentrations of 0.3 – 30  $\mu$ M as well as AP-18 in a concentration of 2.5  $\mu$ M with or without co-treatment of 30  $\mu$ M CIB or CAL. Values are displayed as mean  $\pm$  SD in percent compared to the control (buffer with 0.1 % ethanol). n = 3-4 (tr = 3-6).
